# Supplementary material
Source: PubMed Central journal article supplement (PMC428462)
Supplement: pnas_101_24_9003__2.pdf [file pnas_101_24_9003__2.pdf]

**Table 1. List of sequences (with GenBank database accession nos.) and taxa**

| Gene                     | Species and strain                      | Genbank accession no. |
|--------------------------|-----------------------------------------|-----------------------|
| Small subunit (SSU) rRNA | <i>Caenorhabditis briggsae</i> PB102    | U13929                |
|                          | <i>Caenorhabditis remanei</i> SB146     | U13931                |
|                          | <i>Caenorhabditis</i> sp. CB5161        | U13930                |
|                          | <i>Caenorhabditis elegans</i> N2        | X03680                |
|                          | <i>Caenorhabditis japonica</i> SB339    | AY602182*             |
|                          | <i>Caenorhabditis</i> sp. PS1010        | AF083006              |
|                          | <i>Caenorhabditis</i> sp. DF5070        | AY602181*             |
|                          | <i>Caenorhabditis drosophilae</i> SB225 | AF083025              |
|                          | <i>Caenorhabditis plicata</i> SB355     | AY602178*             |
|                          | <i>Caenorhabditis</i> sp. SB341         | AY602180*             |
|                          | <i>Prodontrhabditis wirthi</i> DF5074   | AY602179*             |
|                          | <i>Protrhabditis</i> sp. DF5055         | AF083001              |
|                          | <i>Oscheius myriophila</i> EM435        | U13936                |
|                          | <i>Rhabditella axei</i> DF5006          | U13934                |
|                          | <i>Mus musculus</i>                     | X00686                |
|                          | <i>Rattus norvegicus</i>                | M11188                |
|                          | <i>Homo sapiens</i>                     | M10098                |
|                          | <i>Equus caballus</i>                   | AJ311673              |
|                          | <i>Didelphis virginiana</i>             | AJ311677              |
|                          | <i>Ornithorhynchus anatinus</i>         | AJ311679              |
|                          | <i>Alligator mississippiensis</i>       | AF173605              |
|                          | <i>Gallus gallus</i>                    | AF173612              |
|                          | <i>Xenopus laevis</i>                   | X04025                |
|                          | <i>Ambystoma mexicanum</i>              | M59384                |
|                          | <i>Latimeria chalumnae</i>              | L11288                |
|                          | <i>Danio rerio</i>                      | AC139725              |
|                          | <i>Lampetra aepyptera</i>               | M97573                |
|                          | <i>Branchiostoma floridae</i>           | M97571                |
|                          | <i>Ciona intestinalis</i>               | AB013017              |
|                          | <i>Saccoglossus bromophenolosus</i>     | AF236801              |
|                          | <i>Strongylocentrotus purpuratus</i>    | L28056                |
|                          | <i>Drosophila melanogaster</i>          | M21017                |
|                          | <i>Drosophila simulans</i>              | AY037174              |
|                          | <i>Musca</i> sp.                        | AF322423              |

| Gene                      | Species and strain                       | Genbank accession no.           |
|---------------------------|------------------------------------------|---------------------------------|
|                           | <i>Anopheles albimanus</i>               | L78065                          |
|                           | <i>Papilio troilus</i>                   | AF286299                        |
|                           | <i>Forficula auricularia</i>             | Z97594                          |
|                           | <i>Androctonus australis</i>             | X77908                          |
|                           | <i>Artemia salina</i>                    | X01723                          |
|                           | <i>Limulus polyphemus</i>                | U91490                          |
|                           | <i>Helobdella stagnalis</i>              | AF115986                        |
|                           | <i>Crassostrea virginica</i>             | X60315                          |
| RNA polymerase II (RNAP2) | <i>Caenorhabditis briggsae</i> AF16      | Wormbase: CBG05355              |
|                           | <i>Caenorhabditis remanei</i> SB146      | AY601770*, AY601771*            |
|                           | <i>Caenorhabditis</i> sp. CB5161         | AY601775*, AY601776*, AY601777* |
|                           | <i>Caenorhabditis elegans</i> N2         | M29235                          |
|                           | <i>Caenorhabditis japonica</i> SB339     | AY602185*                       |
|                           | <i>Caenorhabditis</i> sp. PS1010 cDNA    | U73448                          |
|                           | <i>Caenorhabditis</i> sp. PS1010 genomic | AY601772*, AY601773*, AY601774* |
|                           | <i>Caenorhabditis</i> sp. DF5070         | AY602189*                       |
|                           | <i>Caenorhabditis drosophilae</i> DF5077 | AY602188*                       |
|                           | <i>Caenorhabditis plicata</i> SB355      | AY602186*                       |
|                           | <i>Caenorhabditis</i> sp. SB341          | AY602187*                       |
|                           | <i>Prodontrhabditis wirthi</i> DF5074    | AY604469*                       |
|                           | <i>Prototrhabditis</i> sp. DF5055        | AY602184*                       |
|                           | <i>Oscheius myriophila</i> DF5020        | AY601778*, AY601779*, AY601780* |
|                           | <i>Rhabditella axei</i> DF5006           | AY602183*                       |
|                           | <i>Mus musculus</i>                      | U37500                          |
|                           | <i>Rattus norvegicus</i>                 | XM_343922                       |
|                           | <i>Cricetulus griseus</i>                | AB052229                        |
|                           | <i>Homo sapiens</i>                      | X63564                          |
|                           | <i>Danio rerio</i>                       | AL929346                        |
|                           | <i>Ciona intestinalis</i>                | JGI: ci0100146994               |
|                           | <i>Drosophila subobscura</i>             | Y18876                          |
|                           | <i>Drosophila madeirensis</i>            | Y18877                          |
|                           | <i>Drosophila guanche</i>                | Y18878                          |
|                           | <i>Drosophila pseudoobscura</i>          | Y18879                          |
|                           | <i>Drosophila melanogaster</i>           | M27431                          |
|                           | <i>Anopheles gambiae</i>                 | XM_317690                       |

| Gene                     | Species and strain                                             | Genbank accession no. |
|--------------------------|----------------------------------------------------------------|-----------------------|
|                          | <i>Artemia salina</i>                                          | U10331                |
|                          | <i>Helobdella stagnalis</i>                                    | U10336                |
|                          | <i>Crassostrea gigas</i>                                       | U10334                |
|                          | <i>Ilyanassa obsoleta</i>                                      | U10338                |
| Large subunit (LSU) rRNA | <i>Caenorhabditis briggsae</i> PB800                           | AY604481*             |
|                          | <i>Caenorhabditis remanei</i> EM464                            | AY602174*             |
|                          | <i>Caenorhabditis</i> sp. CB5161                               | AY602175*             |
|                          | <i>Caenorhabditis elegans</i> N2                               | X03680                |
|                          | <i>Caenorhabditis japonica</i> SB339                           | AY602173*             |
|                          | <i>Caenorhabditis</i> sp. PS1010                               | AY604482*             |
|                          | <i>Caenorhabditis</i> sp. DF5070                               | AY602171*             |
|                          | <i>Caenorhabditis drosophilae</i> DF5077                       | AY602172*             |
|                          | <i>Caenorhabditis plicata</i> SB355                            | AY602167*             |
|                          | <i>Caenorhabditis</i> sp. SB341                                | AY602170*             |
|                          | <i>Prodontorhabditis wirthi</i> DF5074                         | AY602169*             |
|                          | <i>Protorhabditis</i> sp. DF5055                               | AY602168*             |
|                          | <i>Oscheius myriophila</i> DF5020                              | AY602176*             |
|                          | <i>Rhabditella axei</i> DF5006                                 | AY602177*             |
|                          | <i>Homo sapiens</i>                                            | U13369                |
|                          | <i>Mus musculus</i>                                            | X00525                |
|                          | <i>Rattus norvegicus</i>                                       | V01270                |
|                          | <i>Xenopus laevis</i>                                          | X02995                |
|                          | <i>Ambystoma macrodactylum</i>                                 | AF212178              |
|                          | <i>Latimeria chalumnae</i> (coelacanth)                        | U34336                |
|                          | <i>Petromyzon marinus</i> (sea lamprey)                        | AF061798              |
|                          | <i>Branchiostoma floridae</i> (Amphioxus)                      | AF061796              |
|                          | <i>Ciona intestinalis</i> (ascidian, tunicate)                 | AF212177              |
|                          | <i>Florometra serratissima</i> (crinoid)                       | AF212168              |
|                          | <i>Drosophila melanogaster</i>                                 | M21017                |
|                          | <i>Anopheles albimanus</i>                                     | L78065                |
|                          | <i>Attacus ricini</i> (silkworm)                               | AF463459              |
|                          | <i>Tenebrio</i> sp. (beetle)                                   | AY210843              |
|                          | <i>Gromphadorhina laevigata</i> (Madagascar hissing cockroach) | AY210819              |
|                          | <i>Artemia</i> sp.                                             | AY210805              |
|                          | <i>Pandinus imperator</i> (emperor scorpion)                   | AY210830              |

| Gene         | Species and strain                                  | Genbank accession no. |
|--------------|-----------------------------------------------------|-----------------------|
|              | <i>Limulus polyphemus</i> (Atlantic horseshoe crab) | AF212167              |
|              | <i>Orthoporus</i> sp. (millipede)                   | AY210828              |
|              | <i>Crassostrea virginica</i> (eastern oyster)       | AY145400              |
|              | <i>Ilyanassa obsoleta</i>                           | AY145411              |
| <i>par-6</i> | <i>Caenorhabditis briggsae</i> AF16                 | Wormbase:CBG08713     |
|              | <i>Caenorhabditis remanei</i> SB146                 | AY604470*             |
|              | <i>Caenorhabditis</i> sp. CB5161                    | AY604475*             |
|              | <i>Caenorhabditis elegans</i> N2                    | AF070968              |
|              | <i>Caenorhabditis japonica</i> SB339                | AY604473*             |
|              | <i>Caenorhabditis</i> sp. PS1010                    | AY604471*             |
|              | <i>Caenorhabditis</i> sp. DF5070                    | AY604474*             |
|              | <i>Caenorhabditis drosophilae</i> DF5077            | AY604472*             |
| <i>pkc-3</i> | <i>Caenorhabditis briggsae</i> AF16                 | Wormbase: CBG02381    |
|              | <i>Caenorhabditis remanei</i> SB146                 | AY604479*             |
|              | <i>Caenorhabditis</i> sp. CB5161                    | AY604480*             |
|              | <i>Caenorhabditis elegans</i> N2                    | AF025666              |
|              | <i>Caenorhabditis</i> sp. PS1010                    | AY604476*             |
|              | <i>Caenorhabditis</i> sp. DF5070                    | AY604478*             |
|              | <i>Caenorhabditis drosophilae</i> DF5077            | AY604477*             |

\*These sequences are reported in this paper.
